# Supplementary material for: Associations Between Fine Particulate Matter Components and Daily Mortality in Nagoya, Japan
Source: PubMed Central journal article supplement (PMC4848323; doi:10.2188/jea.je20150039), 2016-05-05
Supplement: je-26-249-s001.pdf [file je-26-249-s001.pdf]

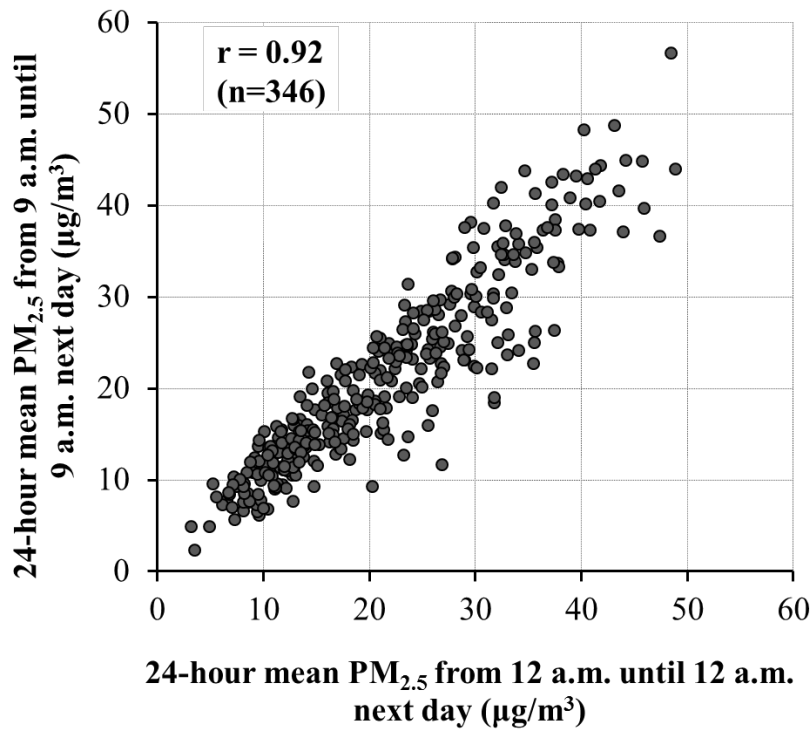

**eFigure 1.** Scatter plot of 24-hour mean concentrations of PM<sub>2.5</sub> from 12 a.m. of the day until 12 a.m. of the next day and those from 9 a.m. of the day until 9 a.m. of the next day (n=346) calculated from the hourly sampling obtained using a Tapered Element Oscillating Microbalance in 2003 at the site, which is 6.5 km from the study site in Nagoya.
