# Supplementary material for: Associations Between Fine Particulate Matter Components and Daily Mortality in Nagoya, Japan
Source: PubMed Central journal article supplement (PMC4848323; doi:10.2188/jea.je20150039), 2016-05-05
Supplement: je-26-249-s002.pdf [file je-26-249-s002.pdf]

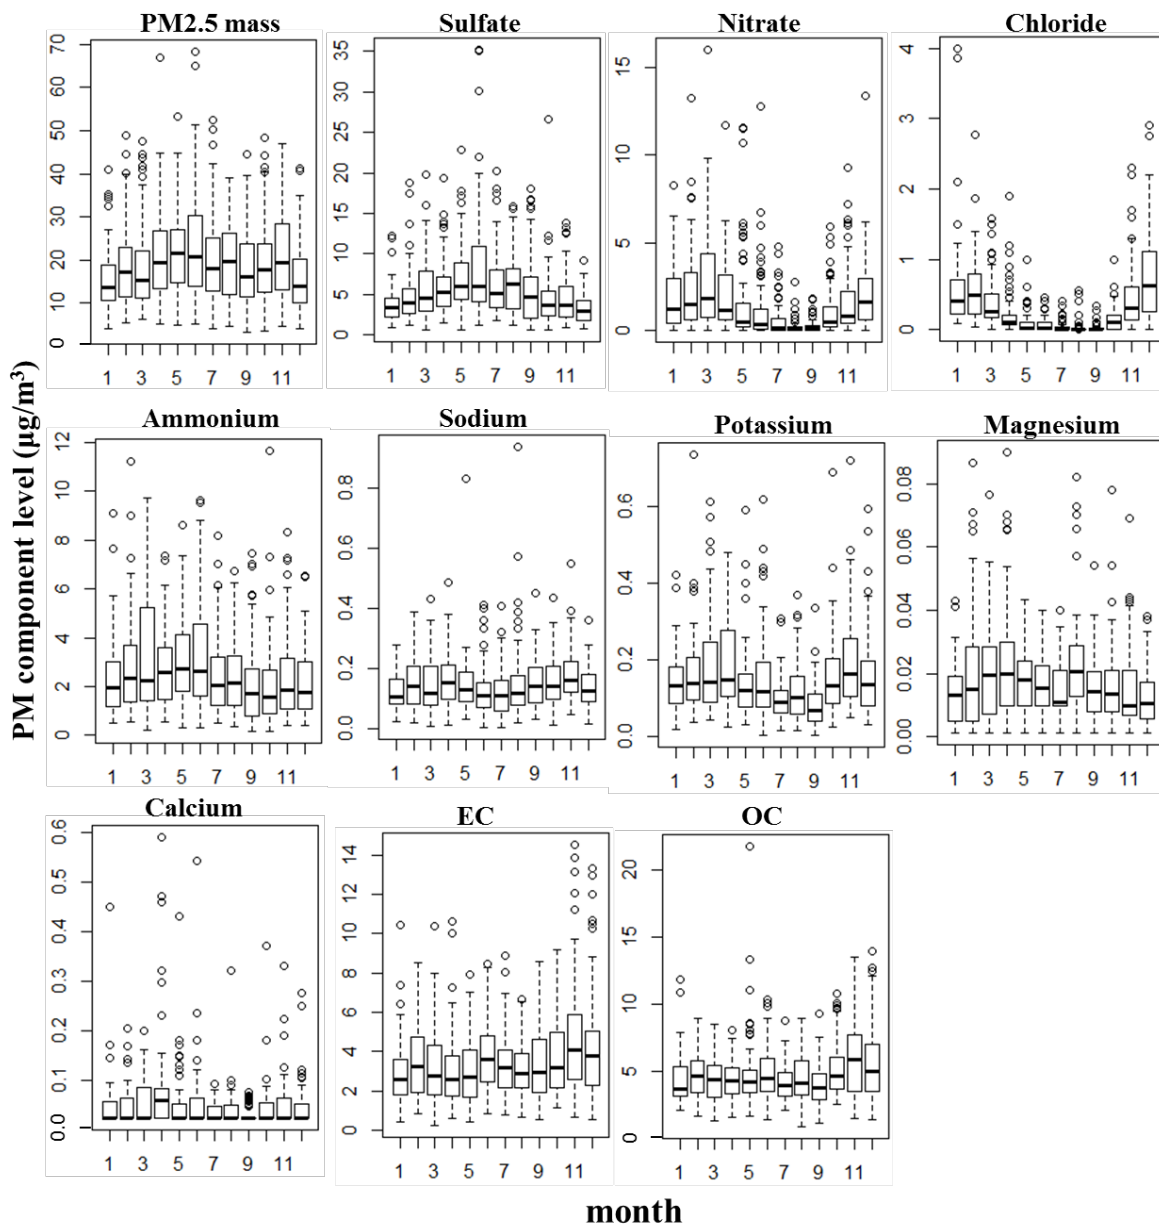

**eFigure 2.** Monthly variation in PM<sub>2.5</sub> mass and its components in Nagoya from April 2003 to December 2007. Box plots represent the median (horizontal line) and the 25th and 75th percentiles (edges of box).
