# Supplementary material for: Associations Between Fine Particulate Matter Components and Daily Mortality in Nagoya, Japan
Source: PubMed Central journal article supplement (PMC4848323; doi:10.2188/jea.je20150039), 2016-05-05
Supplement: je-26-249-s003.pdf [file je-26-249-s003.pdf]

A) All-cause mortality

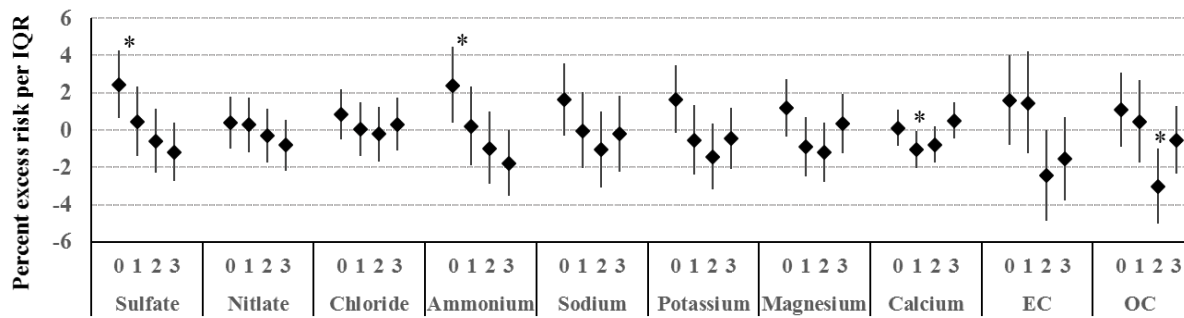

B) Cardiovascular mortality

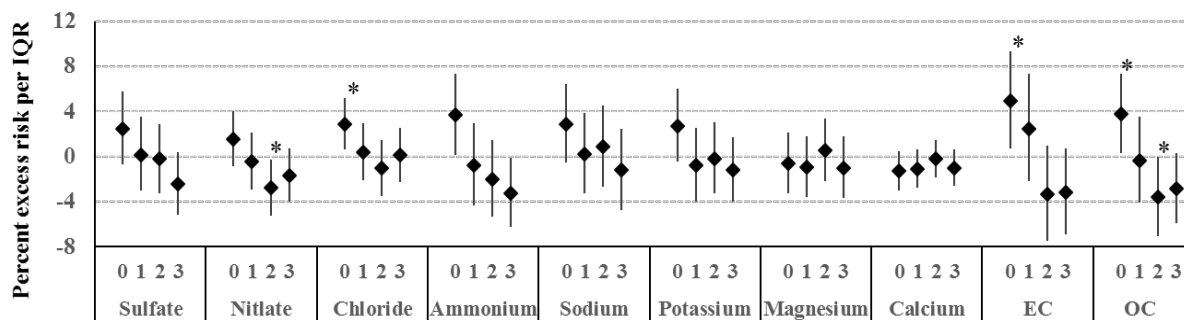

C) Respiratory mortality

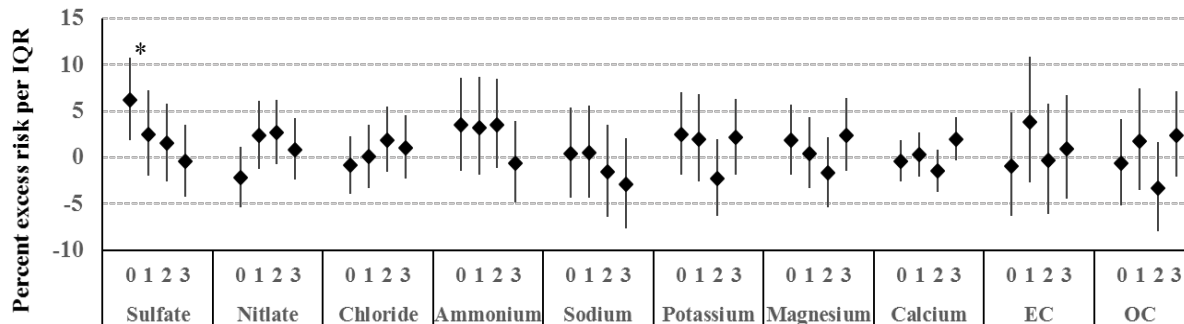

**eFigure 3.** Percent change in all-cause mortality (A), cardiovascular mortality (B), and respiratory mortality (C) per IQR increase in chemical components of PM<sub>2.5</sub> at single-day lags from 0 to 3, adjusted for ambient temperature, relative humidity, O<sub>x</sub>, and NO<sub>2</sub>.

EC, elemental carbon; IQR, interquartile range; OC, organic carbon; PM<sub>2.5</sub>, fine particulate matter.

\* P<0.05
