# Supplementary material for: Associations Between Fine Particulate Matter Components and Daily Mortality in Nagoya, Japan
Source: PubMed Central journal article supplement (PMC4848323; doi:10.2188/jea.je20150039), 2016-05-05
Supplement: je-26-249-s004.pdf [file je-26-249-s004.pdf]

A) All-cause mortality

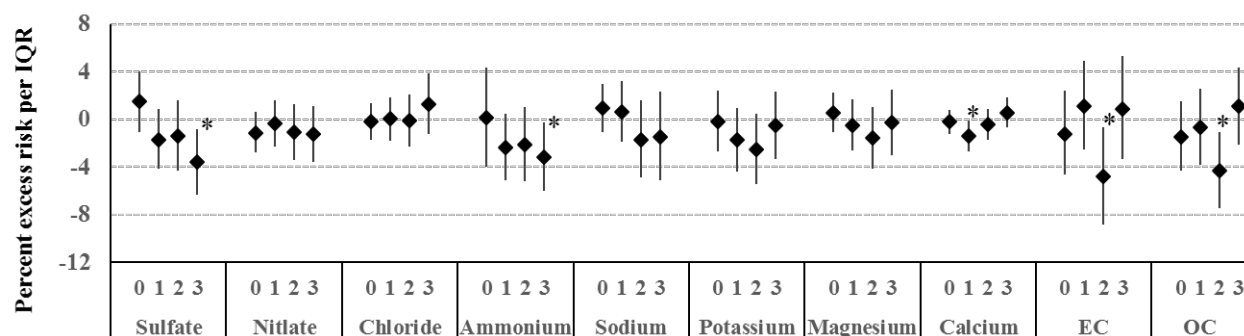

B) Cardiovascular mortality

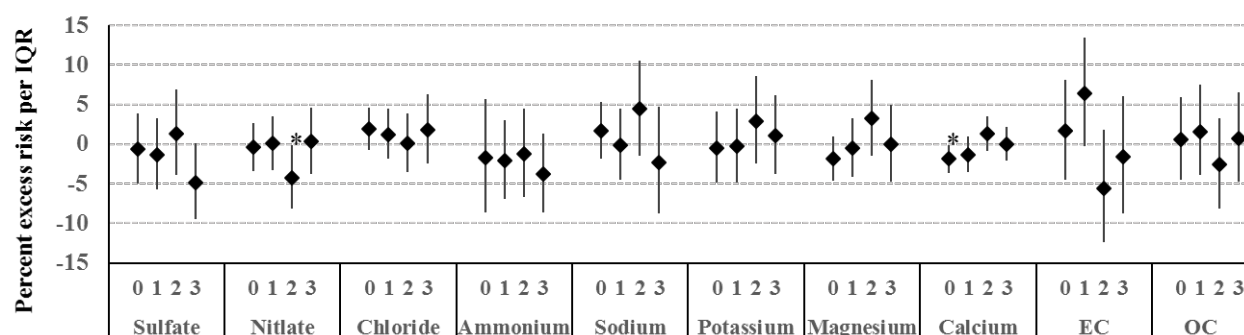

C) Respiratory mortality

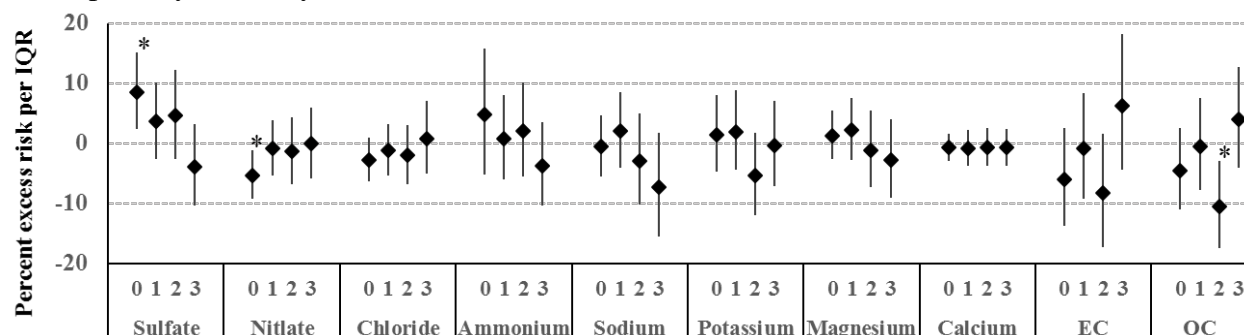

**eFigure 4.** Percent change in all-cause mortality (A), cardiovascular mortality (B), and respiratory mortality (C) per IQR increase in chemical components of PM<sub>2.5</sub> at single-day lags from 0 to 3, adjusted for ambient temperature, relative humidity, Ox, NO<sub>2</sub>, and PM<sub>2.5</sub> mass.

EC, elemental carbon; IQR, interquartile range; NO<sub>2</sub>, nitrogen dioxide; OC, organic carbon; Ox, photochemical oxidants; PM<sub>2.5</sub>, fine particulate matter.

\* P<0.05
