# Supplementary material for: Associations Between Fine Particulate Matter Components and Daily Mortality in Nagoya, Japan
Source: PubMed Central journal article supplement (PMC4848323; doi:10.2188/jea.je20150039), 2016-05-05
Supplement: je-26-249-s005.pdf [file je-26-249-s005.pdf]

**eTable 1.** Average and standard deviation of PM<sub>2.5</sub> mass and its components for each day of the week in Nagoya from April 2003 to December 2007

| Variables                              | Mean (SD)         |                   |                    |                      |                     |                  |
|----------------------------------------|-------------------|-------------------|--------------------|----------------------|---------------------|------------------|
|                                        | Sunday<br>(n=165) | Monday<br>(n=181) | Tuesday<br>(n=195) | Wednesday<br>(n=184) | Thursday<br>(n=182) | Friday<br>(n=18) |
| PM <sub>2.5</sub> (µg/m <sup>3</sup> ) | 19.89 (11.06)     | 23.83 (12.32)     | 23.76 (13.06)      | 24.72 (12.25)        | 24.90 (13.44)       | 33.15 (16.36)    |
| Sulfate (µg/m <sup>3</sup> )           | 4.93 (3.57)       | 5.24 (3.33)       | 5.39 (4.17)        | 5.95 (4.52)          | 6.10 (4.94)         | 7.18 (4.38)      |
| Nitrate (µg/m <sup>3</sup> )           | 1.18 (1.68)       | 1.47 (2.11)       | 1.44 (1.93)        | 1.57 (2.21)          | 1.48 (2.11)         | 2.66 (3.17)      |
| Chloride (µg/m <sup>3</sup> )          | 0.17 (0.25)       | 0.30 (0.47)       | 0.32 (0.54)        | 0.29 (0.45)          | 0.28 (0.44)         | 0.45 (0.51)      |
| Ammonium (µg/m <sup>3</sup> )          | 2.27 (1.60)       | 2.50 (1.70)       | 2.55 (1.85)        | 2.76 (1.88)          | 2.82 (2.07)         | 3.66 (2.58)      |
| Sodium (µg/m <sup>3</sup> )            | 0.13 (0.08)       | 0.15 (0.09)       | 0.14 (0.09)        | 0.15 (0.10)          | 0.15 (0.10)         | 0.16 (0.06)      |
| Potassium (µg/m <sup>3</sup> )         | 0.13 (0.09)       | 0.15 (0.10)       | 0.14 (0.11)        | 0.15 (0.11)          | 0.16 (0.10)         | 0.21 (0.10)      |
| Magnesium (µg/m <sup>3</sup> )         | 0.02 (0.01)       | 0.02 (0.01)       | 0.02 (0.01)        | 0.02 (0.01)          | 0.02 (0.02)         | 0.02 (0.02)      |
| Calcium (µg/m <sup>3</sup> )           | 0.04 (0.07)       | 0.05 (0.06)       | 0.05 (0.05)        | 0.05 (0.04)          | 0.05 (0.05)         | 0.07 (0.05)      |
| Elemental carbon (µg/m <sup>3</sup> )  | 2.25 (1.30)       | 3.71 (2.09)       | 3.74 (2.11)        | 3.91 (2.12)          | 3.84 (2.24)         | 5.09 (3.24)      |
| Organic carbon (µg/m <sup>3</sup> )    | 4.22 (1.95)       | 4.87 (2.36)       | 4.73 (2.03)        | 4.89 (1.97)          | 4.97 (2.21)         | 6.54 (2.95)      |

PM<sub>2.5</sub>, fine particulate matter; SD, standard deviation.
